# Supplementary material
Source: HighWire-hosted journal article supplement (https://sti.bmj.com/content/93/6/390)

Web Only Figure. The frequency of syphilis diagnosis among MSM over time for each of the clusters:  
 (a) Cluster 1 (10 cases, from July 2009 to September 2010), (b) Cluster 2 (1.123 cases, from July 2011 to December 2015), and (c) Cluster 3 (72 cases, from April 2015 to September 2015).

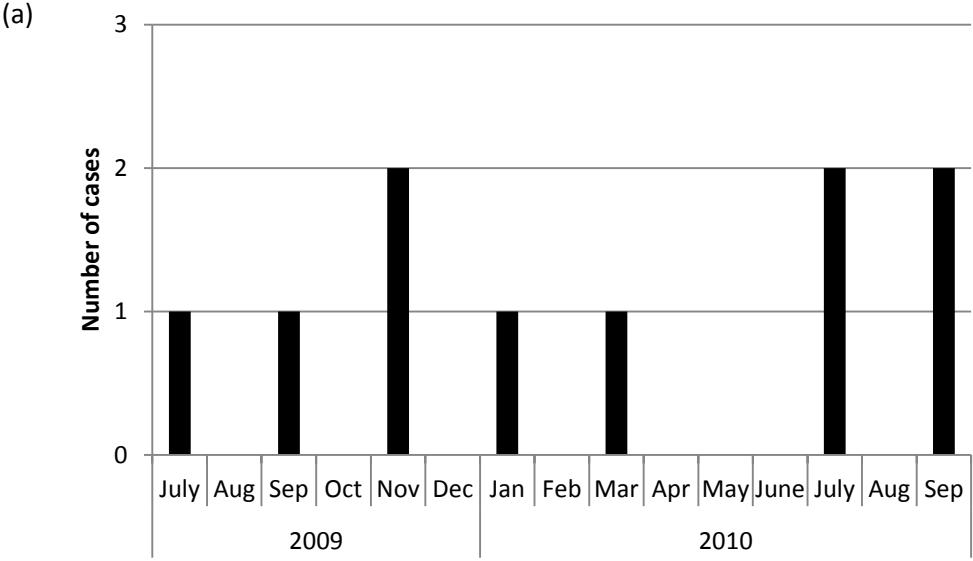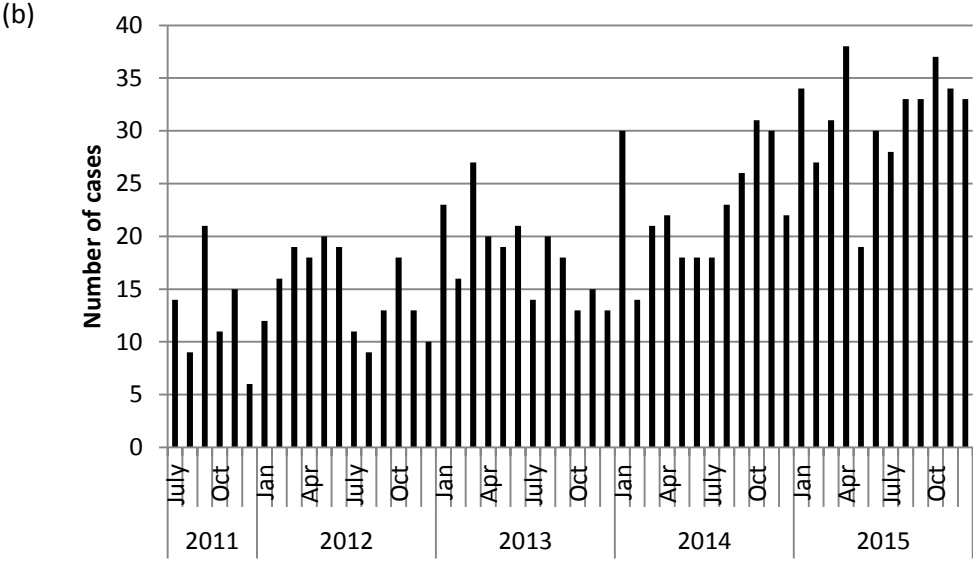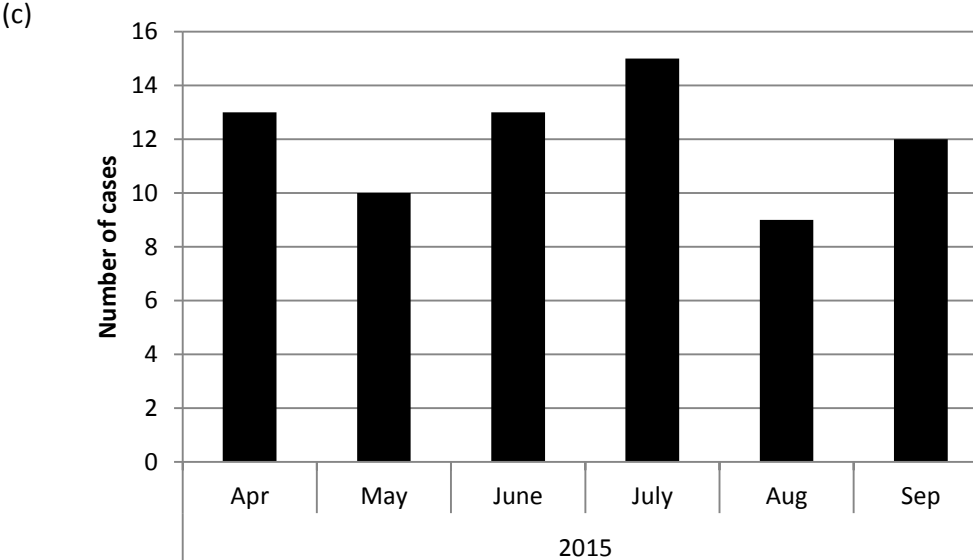

Supplement: inline-supplementary-material-1 [file inline-supplementary-material-1.pdf]
